# Supplementary material for: Bioinformatics analysis and identification of circular RNAs promoting the osteogenic differentiation of human bone marrow mesenchymal stem cells on titanium treated by surface mechanical attrition
Source: PeerJ. 2020 Jul 13;8:e9292. doi: 10.7717/peerj.9292 (PMC7365136; doi:10.7717/peerj.9292)
Supplement: Supplemental Information 3 [file peerj-08-9292-s003.xls]

## Sheet: Sheet2
Application: Tecan i-control				Tecan i-control , 1.10.4.0
Device: infinite 200Pro				Serial number: 1304005221				Serial number of connected stacker:
Firmware: V_3.37_07/12_Infinite (Jul 20 2012/13.56.47)				MAI, V_3.37_07/12_Infinite (Jul 20 2012/13.56.47)
Date:	2018-09-13
Time:	14:13:47
System				79731800D7EA404
User				79731800D7EA404\new
Plate				Greiner 96 Flat Bottom Transparent Polystyrol [GRE96ft.pdfx]
Plate-ID (Stacker)
Label: Label1
Mode				Absorbance
Wavelength				450	nm
Bandwidth				10	nm
Number of Flashes				25
Settle Time				0	ms
Part of Plate				C3-C11
Start Time:	2019-7-27 14:13:47
	Temperature: 27.3 °C
<>	3	4	5	6	7	8	9	10	11
C	0.6345	0.6258	0.635	0.6146	0.6119	0.613	0.1872	0.1873	0.1871
End Time:	2019-7-27 14:13:47
