# Supplementary material for: Bioinformatics analysis and identification of circular RNAs promoting the osteogenic differentiation of human bone marrow mesenchymal stem cells on titanium treated by surface mechanical attrition
Source: PeerJ. 2020 Jul 13;8:e9292. doi: 10.7717/peerj.9292 (PMC7365136; doi:10.7717/peerj.9292)
Supplement: Supplemental Information 9 [file peerj-08-9292-s009.xls]

## Sheet: Sheet1
Standard protein	0	1.25	2	2.5	4	8
Standard protein OD	0.113	0.158	0.183	0.212	0.247	0.366
sample OD	0.8735	0.783	0.78	0.7535	0.74	0.805
