# Supplementary material for: Bioinformatics analysis and identification of circular RNAs promoting the osteogenic differentiation of human bone marrow mesenchymal stem cells on titanium treated by surface mechanical attrition
Source: PeerJ. 2020 Jul 13;8:e9292. doi: 10.7717/peerj.9292 (PMC7365136; doi:10.7717/peerj.9292)
Supplement: Supplemental Information 14 [file peerj-08-9292-s014.xlsx]

## Sheet: Sheet1
1st time			2nd time			3rd time
Annealed GAPDH	17.96		Annealed GAPDH	18.58		Annealed GAPDH	18.64
Annealed GAPDH	17.96		Annealed GAPDH	18.58		Annealed GAPDH	18.64
Annealed GAPDH	17.96		Annealed GAPDH	18.58		Annealed GAPDH	18.64
Annealed hsa-circ-0032599	32.26		Annealed hsa-circ-0032599	32.96		Annealed hsa-circ-0032599	31.99
Annealed hsa-circ-0032599	32.23		Annealed hsa-circ-0032599	32.96		Annealed hsa-circ-0032599	32
Annealed hsa-circ-0032599			Annealed hsa-circ-0032599			Annealed hsa-circ-0032599	31.98
Annealed hsa-circ-0032600	27.47		Annealed hsa-circ-0032600	26.92		Annealed hsa-circ-0032600	26.99
Annealed hsa-circ-0032600	27.49		Annealed hsa-circ-0032600	26.9		Annealed hsa-circ-0032600	27
Annealed hsa-circ-0032600	27.51		Annealed hsa-circ-0032600	26.94		Annealed hsa-circ-0032600	26.98
Annealed hsa-circ-0032601	35.93		Annealed hsa-circ-0032601	35.79		Annealed hsa-circ-0032601	36
Annealed hsa-circ-0032601	35.93		Annealed hsa-circ-0032601	35.7		Annealed hsa-circ-0032601	36
Annealed hsa-circ-0032601			Annealed hsa-circ-0032601	35.87		Annealed hsa-circ-0032601	36
SMAT GAPDH	17.3		SMAT GAPDH	18.04		SMAT GAPDH	18.28
SMAT GAPDH	17.33		SMAT GAPDH	18.04		SMAT GAPDH	18.28
SMAT GAPDH	17.36		SMAT GAPDH	18.04		SMAT GAPDH	18.28
SMAT hsa-circ-0032599	31.9		SMAT hsa-circ-0032599	33		SMAT hsa-circ-0032599	32.63
SMAT hsa-circ-0032599	31.91		SMAT hsa-circ-0032599	33		SMAT hsa-circ-0032599	32.6
SMAT hsa-circ-0032599	31.92		SMAT hsa-circ-0032599	33		SMAT hsa-circ-0032599	32.66
SMAT hsa-circ-0032600	26.14		SMAT hsa-circ-0032600	25		SMAT hsa-circ-0032600	25.19
SMAT hsa-circ-0032600	26.14		SMAT hsa-circ-0032600	25		SMAT hsa-circ-0032600	25.19
SMAT hsa-circ-0032600			SMAT hsa-circ-0032600	25		SMAT hsa-circ-0032600
SMAT hsa-circ-0032601	35.84		SMAT hsa-circ-0032601	36		SMAT hsa-circ-0032601	35.7
SMAT hsa-circ-0032601	35.8		SMAT hsa-circ-0032601	35.6		SMAT hsa-circ-0032601	36
SMAT hsa-circ-0032601	35.88		SMAT hsa-circ-0032601	34		SMAT hsa-circ-0032601	36.3
