# Supplementary material for: Bioinformatics analysis and identification of circular RNAs promoting the osteogenic differentiation of human bone marrow mesenchymal stem cells on titanium treated by surface mechanical attrition
Source: PeerJ. 2020 Jul 13;8:e9292. doi: 10.7717/peerj.9292 (PMC7365136; doi:10.7717/peerj.9292)
Supplement: Supplemental Information 16 [file peerj-08-9292-s016.xlsx]

## Sheet: Sheet1
1st time			2nd time			3rd time
Annealed GAPDH	15.96		Annealed GAPDH	16.78		Annealed GAPDH	17.04
Annealed GAPDH	15.96		Annealed GAPDH	16.78		Annealed GAPDH	17.01
Annealed GAPDH	15.96		Annealed GAPDH	16.78		Annealed GAPDH	17.07
Annealed hsa-circ-0032599	30.2		Annealed hsa-circ-0032599	30.86		Annealed hsa-circ-0032599	30.81
Annealed hsa-circ-0032599	30.28		Annealed hsa-circ-0032599	30.86		Annealed hsa-circ-0032599	30.77
Annealed hsa-circ-0032599	30.24		Annealed hsa-circ-0032599			Annealed hsa-circ-0032599	30.79
Annealed hsa-circ-0032600	26.49		Annealed hsa-circ-0032600	26.28		Annealed hsa-circ-0032600	27.3
Annealed hsa-circ-0032600	26.49		Annealed hsa-circ-0032600	26.36		Annealed hsa-circ-0032600	27.3
Annealed hsa-circ-0032600	26.49		Annealed hsa-circ-0032600	26.32		Annealed hsa-circ-0032600	27.3
Annealed hsa-circ-0032601	33.9		Annealed hsa-circ-0032601	33.99		Annealed hsa-circ-0032601	34.55
Annealed hsa-circ-0032601	33.96		Annealed hsa-circ-0032601	33.9		Annealed hsa-circ-0032601	34.61
Annealed hsa-circ-0032601	33.93		Annealed hsa-circ-0032601	34.08		Annealed hsa-circ-0032601	34.58
SMAT GAPDH	16.93		SMAT GAPDH	16.84		SMAT GAPDH	17.08
SMAT GAPDH	16.93		SMAT GAPDH	16.84		SMAT GAPDH	17.08
SMAT GAPDH	16.93		SMAT GAPDH	16.84		SMAT GAPDH	17.08
SMAT hsa-circ-0032599	30.18		SMAT hsa-circ-0032599	31.13		SMAT hsa-circ-0032599	31
SMAT hsa-circ-0032599	30.21		SMAT hsa-circ-0032599	31.23		SMAT hsa-circ-0032599	31.03
SMAT hsa-circ-0032599	30.24		SMAT hsa-circ-0032599	31.18		SMAT hsa-circ-0032599	31.06
SMAT hsa-circ-0032600	26.24		SMAT hsa-circ-0032600	26.29		SMAT hsa-circ-0032600	26.13
SMAT hsa-circ-0032600	26.24		SMAT hsa-circ-0032600	26.29		SMAT hsa-circ-0032600	26.19
SMAT hsa-circ-0032600	26.24		SMAT hsa-circ-0032600	26.29		SMAT hsa-circ-0032600	26.25
SMAT hsa-circ-0032601	34.34		SMAT hsa-circ-0032601	34.4		SMAT hsa-circ-0032601	34.39
SMAT hsa-circ-0032601	34.32		SMAT hsa-circ-0032601	34.44		SMAT hsa-circ-0032601	34.39
SMAT hsa-circ-0032601	34.36		SMAT hsa-circ-0032601	34.42		SMAT hsa-circ-0032601
