# Supplementary material for: Bioinformatics analysis and identification of circular RNAs promoting the osteogenic differentiation of human bone marrow mesenchymal stem cells on titanium treated by surface mechanical attrition
Source: PeerJ. 2020 Jul 13;8:e9292. doi: 10.7717/peerj.9292 (PMC7365136; doi:10.7717/peerj.9292)
Supplement: Supplemental Information 17 [file peerj-08-9292-s017.xlsx]

## Sheet: Sheet1
	chr	start	end	strand	circID	genomic length	spliced seq length	best transcript	gene symbol
	chr10	36177992	36190042	+	hsa_circ_0076184	12050	1315	NM_015695	BRPF3
	chr10	48718596	48725112	-	hsa_circ_0002749	6516	313	NM_014959	CARD8
	chr13	48722127	48735067	-	hsa_circ_0051734	12940	912	NM_014959	CARD8
	chr14	48724986	48725112	-	hsa_circ_0051735	126	126	NM_001184902	CARD8
	chr14	48733694	48741789	-	hsa_circ_0051736	8095	976	NM_001184902	CARD8
	chr14	111156193	111165373	+	hsa_circ_0030878	9180	1836	NM_001846	COL4A2
	chr14	234370993	234371105	+	hsa_circ_0058776	112	112	NM_152879	DGKD
	chr14	327139	332287	-	hsa_circ_0017364	5148	374	NM_014974	DIP2C
	chr14	327139	387269	-	hsa_circ_0017365	60130	965	NM_014974	DIP2C
	chr14	153590037	153593325	-	hsa_circ_0091990	3288	1253	NM_001110556	FLNA
	chr14	153590037	153593854	-	hsa_circ_0091991	3817	1515	NM_001110556	FLNA
	chr14	153590037	153595007	-	hsa_circ_0091992	4970	1957	NM_001110556	FLNA
	chr14	153590346	153592740	-	hsa_circ_0091997	2394	804	NM_001110556	FLNA
	chr14	153590346	153593627	-	hsa_circ_0091998	3281	1259	NM_001110556	FLNA
	chr14	153590346	153594592	-	hsa_circ_0091999	4246	1598	NM_001110556	FLNA
	chr14	153590346	153595007	-	hsa_circ_0092000	4661	1839	NM_001110556	FLNA
	chr14	153590346	153595218	-	hsa_circ_0092001	4872	1958	NM_001110556	FLNA
	chr15	153590785	153593854	-	hsa_circ_0092008	3069	1136	NM_001110556	FLNA
	chr15	153591028	153592740	-	hsa_circ_0092009	1712	382	NM_001110556	FLNA
	chr15	153591028	153595218	-	hsa_circ_0092010	4190	1536	NM_001110556	FLNA
	chr15	52418144	52433469	-	hsa_circ_0035311	15325	515	NM_016194	GNB5
	chr15	52425574	52433469	-	hsa_circ_0035312	7895	369	NM_016194	GNB5
	chr15	52427809	52472076	-	hsa_circ_0035313	44267	645	NM_016194	GNB5
	chr15	74972750	74989621	-	hsa_circ_0032566	16871	1647	NM_000428	LTBP2
	chr15	74974675	75002703	-	hsa_circ_0032576	28028	1986	NM_000428	LTBP2
	chr15	74975306	75002703	-	hsa_circ_0032579	27397	1863	NM_000428	LTBP2
	chr15	74975940	74989621	-	hsa_circ_0032584	13681	873	NM_000428	LTBP2
	chr15	74975940	75002703	-	hsa_circ_0032585	26763	1614	NM_000428	LTBP2
	chr15	74977947	75002703	-	hsa_circ_0032594	24756	1239	NM_000428	LTBP2
	chr17	74989492	74995825	-	hsa_circ_0032599	6333	672	NM_000428	LTBP2
	chr17	74989492	75002703	-	hsa_circ_0032600	13211	870	NM_000428	LTBP2
	chr17	74989492	75018053	-	hsa_circ_0032601	28561	1260	NM_000428	LTBP2
	chr17	74989492	75022396	-	hsa_circ_0032602	32904	1829	NM_000428	LTBP2
	chr17	74991826	74991928	-	hsa_circ_0032604	102	102	NM_000428	LTBP2
	chr17	74991826	75052821	-	hsa_circ_0032605	60995	1965	NM_000428	LTBP2
	chr17	74994049	75018053	-	hsa_circ_0032607	24004	989	NM_000428	LTBP2
	chr17	74994049	75022396	-	hsa_circ_0032608	28347	1558	NM_000428	LTBP2
	chr17	90437551	90457189	-	hsa_circ_0077356	19638	1710	NM_014611	MDN1
	chr17	90457047	90460251	-	hsa_circ_0077360	3204	677	NM_014611	MDN1
	chr17	90482291	90513273	-	hsa_circ_0077371	30982	1981	NM_014611	MDN1
	chr18	90494730	90513273	-	hsa_circ_0077375	18543	1347	NM_014611	MDN1
	chr18	36690137	36702653	-	hsa_circ_0063112	12516	1994	NM_002473	MYH9
	chr19	36690977	36697711	-	hsa_circ_0063114	6734	1131	NM_002473	MYH9
	chr19	36691550	36697711	-	hsa_circ_0063115	6161	986	NM_002473	MYH9
	chr19	36694964	36714370	-	hsa_circ_0063117	19406	1992	NM_002473	MYH9
	chr19	9708227	9792232	+	hsa_circ_0046890	84005	376	NM_006868	RAB31
	chr2	9708227	9815219	+	hsa_circ_0046891	106992	555	NM_006868	RAB31
	chr22	99645285	99666997	+	hsa_circ_0037043	21712	1125	NM_145728	SYNM
	chr22	78305164	78317839	-	hsa_circ_0036435	12675	1423	NM_144572	TBC1D2B
	chr22	78305164	78322512	-	hsa_circ_0036436	17348	1587	NM_144572	TBC1D2B
	chr22	78308887	78317839	-	hsa_circ_0036437	8952	928	NM_144572	TBC1D2B
	chr6	78308887	78337410	-	hsa_circ_0036438	28523	1261	NM_144572	TBC1D2B
	chr6	78316497	78317839	-	hsa_circ_0036439	1342	623	NM_144572	TBC1D2B
	chr6	78316497	78337410	-	hsa_circ_0036440	20913	956	NM_144572	TBC1D2B
	chr6	78337241	78346529	-	hsa_circ_0036441	9288	323	NM_144572	TBC1D2B
	chr6	80828099	80888519	+	hsa_circ_0046529	60420	1795	NM_005993	TBCD
	chrX	80858526	80888519	+	hsa_circ_0046568	29993	1464	NM_005993	TBCD
	chrX	80858526	80897352	+	hsa_circ_0046569	38826	1830	NM_005993	TBCD
	chrX	80861280	80888519	+	hsa_circ_0046577	27239	1383	NM_005993	TBCD
	chrX	80863811	80888519	+	hsa_circ_0046588	24708	1309	NM_005993	TBCD
	chrX	80863811	80896012	+	hsa_circ_0046589	32201	1565	NM_005993	TBCD
	chrX	80863811	80897352	+	hsa_circ_0046590	33541	1675	NM_005993	TBCD
	chrX	80863811	80899359	+	hsa_circ_0046591	35548	1760	NM_005993	TBCD
	chrX	80869633	80887376	+	hsa_circ_0046594	17743	985	NM_005993	TBCD
	chrX	80879376	80897352	+	hsa_circ_0046595	17976	1378	NM_005993	TBCD
	chrX	80885780	80887376	+	hsa_circ_0046596	1596	382	NM_005993	TBCD
	chrX	62254947	62273677	-	hsa_circ_0035596	18730	1406	NM_001018088	VPS13C
