# Supplementary material for: Bioinformatics analysis and identification of circular RNAs promoting the osteogenic differentiation of human bone marrow mesenchymal stem cells on titanium treated by surface mechanical attrition
Source: PeerJ. 2020 Jul 13;8:e9292. doi: 10.7717/peerj.9292 (PMC7365136; doi:10.7717/peerj.9292)
Supplement: Supplemental Information 19 [file peerj-08-9292-s019.xlsx]

## Sheet: Sheet1
	miRNA name	ensembl id	gene symbol	circID
	hsa-miR-18b-5p	ENST00000301732	ABCA3	hsa_circ_0037512
				hsa_circ_0037513
	hsa-miR-145-5p	ENST00000357641	BRPF3	hsa_circ_0076184
		ENST00000534400
	hsa-miR-6088	ENST00000520753	CARD8	hsa_circ_0002749
		ENST00000447740		hsa_circ_0051734
		ENST00000520015		hsa_circ_0051735
		ENST00000520153		hsa_circ_0051736
		ENST00000391898
		ENST00000521613
		ENST00000519940
	hsa-miR-145-5p	ENST00000360467	COL4A2	hsa_circ_0030855
				hsa_circ_0030856
				hsa_circ_0030857
				hsa_circ_0030864
				hsa_circ_0030869
				hsa_circ_0030873
				hsa_circ_0030874
				hsa_circ_0030877
				hsa_circ_0030878
	hsa-miR-129-5p	ENST00000264057	DGKD	hsa_circ_0058761
		ENST00000409813		hsa_circ_0058765
				hsa_circ_0058776
	hsa-miR-24-3p	ENST00000280886	DIP2C	hsa_circ_0017363
		ENST00000634311		hsa_circ_0017364
				hsa_circ_0017365
				hsa_circ_0017366
				hsa_circ_0017367
	hsa-miR-129-5p	ENST00000360184	DYNC1H1	hsa_circ_0033213
				hsa_circ_0033215
				hsa_circ_0033314
	hsa-miR-5195-3p	ENST00000344736	FLNA	hsa_circ_0091988
		ENST00000422373		hsa_circ_0091990
		ENST00000369850		hsa_circ_0091991
				hsa_circ_0091992
				hsa_circ_0091997
				hsa_circ_0091998
				hsa_circ_0091999
				hsa_circ_0092000
				hsa_circ_0092001
				hsa_circ_0092002
				hsa_circ_0092003
				hsa_circ_0092008
				hsa_circ_0092009
				hsa_circ_0092010
				hsa_circ_0091998
				hsa_circ_0091999
				hsa_circ_0092000
				hsa_circ_0092001
				hsa_circ_0092002
				hsa_circ_0092003
				hsa_circ_0092008
				hsa_circ_0092009
				hsa_circ_0092010
	hsa-miR-5195-3p	ENST00000261837	GNB5	hsa_circ_0035311
		ENST00000358784		hsa_circ_0035312
				hsa_circ_0035313
	hsa-let-7b-5p	ENST00000443617	HERC1	hsa_circ_0035675
				hsa_circ_0035676
				hsa_circ_0035693
				hsa_circ_0035701
				hsa_circ_0035702
				hsa_circ_0035703
				hsa_circ_0035707
				hsa_circ_0035710
				hsa_circ_0035715
				hsa_circ_0035720
				hsa_circ_0035721
	hsa-miR-129-5p	ENST00000261978	LTBP2	hsa_circ_0032560
	hsa-miR-5195-3p	ENST00000261978		hsa_circ_0032565
				hsa_circ_0032566
				hsa_circ_0032568
				hsa_circ_0032573
				hsa_circ_0032574
				hsa_circ_0032576
				hsa_circ_0032577
				hsa_circ_0032579
				hsa_circ_0032584
				hsa_circ_0032585
				hsa_circ_0032594
				hsa_circ_0032595
				hsa_circ_0032599
				hsa_circ_0032600
				hsa_circ_0032601
				hsa_circ_0032602
				hsa_circ_0032603
				hsa_circ_0032604
				hsa_circ_0032605
				hsa_circ_0032606
				hsa_circ_0032607
				hsa_circ_0032608
	hsa-miR-1224-5p	ENST00000328913	MCF2L2	hsa_circ_0068150
				hsa_circ_0068151
				hsa_circ_0068152
	hsa-miR-5195-3p	ENST00000369393	MDN1	hsa_circ_0077334
				hsa_circ_0077350
				hsa_circ_0077351
				hsa_circ_0077352
				hsa_circ_0077353
				hsa_circ_0077354
				hsa_circ_0077355
				hsa_circ_0077356
				hsa_circ_0077357
				hsa_circ_0077358
				hsa_circ_0077359
				hsa_circ_0077360
				hsa_circ_0077361
				hsa_circ_0077362
				hsa_circ_0077363
				hsa_circ_0077364
				hsa_circ_0077371
				hsa_circ_0077375
	hsa-miR-129-5p	ENST00000216181	MYH9	hsa_circ_0063074
				hsa_circ_0063075
				hsa_circ_0063076
				hsa_circ_0063077
				hsa_circ_0063078
				hsa_circ_0063079
				hsa_circ_0063080
				hsa_circ_0063081
				hsa_circ_0063082
				hsa_circ_0063083
				hsa_circ_0063084
				hsa_circ_0063085
				hsa_circ_0063086
				hsa_circ_0063087
				hsa_circ_0063089
				hsa_circ_0063094
				hsa_circ_0063095
				hsa_circ_0063096
				hsa_circ_0063097
				hsa_circ_0063098
				hsa_circ_0063099
				hsa_circ_0063100
				hsa_circ_0063101
				hsa_circ_0063102
				hsa_circ_0063103
				hsa_circ_0063105
				hsa_circ_0063106
				hsa_circ_0063107
				hsa_circ_0063108
				hsa_circ_0063109
				hsa_circ_0063110
				hsa_circ_0063111
				hsa_circ_0063112
				hsa_circ_0063113
				hsa_circ_0063114
				hsa_circ_0063115
				hsa_circ_0063116
				hsa_circ_0063117
	hsa-miR-129-5p	ENST00000395896	VPS13C	hsa_circ_0035578
		ENST00000249837		hsa_circ_0035583
		ENST00000261517		hsa_circ_0035584
		ENST00000395898		hsa_circ_0035587
				hsa_circ_0035588
				hsa_circ_0035590
				hsa_circ_0035591
				hsa_circ_0035593
				hsa_circ_0035594
				hsa_circ_0035595
				hsa_circ_0035596
	hsa-miR-5195-3p	ENST00000578921	RAB31	hsa_circ_0046890
				hsa_circ_0046891
				hsa_circ_0046892
	hsa-miR-129-5p	ENST00000349721	SMARCA2	hsa_circ_0086204
		ENST00000357248		hsa_circ_0086205
		ENST00000450198
		ENST00000382203
	hsa-miR-1224-5p	ENST00000312358	SPEG	hsa_circ_0058380
	hsa-miR-24-3p	ENST00000336292	SYNM	hsa_circ_0037043
		ENST00000594047
	hsa-miR-129-5p	ENST00000409931	TBC1D2B	hsa_circ_0036433
		ENST00000300584		hsa_circ_0036434
				hsa_circ_0036435
				hsa_circ_0036436
				hsa_circ_0036437
				hsa_circ_0036438
				hsa_circ_0036439
				hsa_circ_0036440
				hsa_circ_0036441
	hsa-miR-5195-3p	ENST00000539345	TBCD	hsa_circ_0046460
	hsa-miR-5195-3p	ENST00000355528		hsa_circ_0046478
				hsa_circ_0046479
				hsa_circ_0046480
				hsa_circ_0046481
				hsa_circ_0046503
				hsa_circ_0046514
				hsa_circ_0046529
				hsa_circ_0046530
				hsa_circ_0046541
				hsa_circ_0046568
				hsa_circ_0046569
				hsa_circ_0046577
				hsa_circ_0046588
				hsa_circ_0046589
				hsa_circ_0046590
				hsa_circ_0046591
				hsa_circ_0046592
				hsa_circ_0046594
				hsa_circ_0046595
				hsa_circ_0046596
