# Supplementary material for: Bioinformatics analysis and identification of circular RNAs promoting the osteogenic differentiation of human bone marrow mesenchymal stem cells on titanium treated by surface mechanical attrition
Source: PeerJ. 2020 Jul 13;8:e9292. doi: 10.7717/peerj.9292 (PMC7365136; doi:10.7717/peerj.9292)
Supplement: Supplemental Information 20 [file peerj-08-9292-s020.xlsx]

## Sheet: Sheet1
	SMAD	SMAD	SMAD	Annealed	Annealed	Annealed
day7	75.23	86.79	83.52	76.93	71.75	55.04
day14	94.99	88.78	85.34	79.67	81.56	72.79
day21	94.99	90.89	94.99	94.99	94.99	90.8
