# Supplementary material for: Bioinformatics analysis and identification of circular RNAs promoting the osteogenic differentiation of human bone marrow mesenchymal stem cells on titanium treated by surface mechanical attrition
Source: PeerJ. 2020 Jul 13;8:e9292. doi: 10.7717/peerj.9292 (PMC7365136; doi:10.7717/peerj.9292)
Supplement: Supplemental Information 21 [file peerj-08-9292-s021.xlsx]

## Sheet: mRNA
文献报道的相关基因		暂选择的部分通路			暂时确认的mRNA
ALK	238	BMP/SMAD			WNT3	7473	pink
COLIA1	1277	MAPK/ERK/JNK/P38			WNT4	54361	pink
RUNX2	860	Wnt			WNT8B	7479	pink
SP7	121340	Notch			RUNX2	860	pink
IBSP	3381				IGF1	3479	pink
COL10VA1	1300				ACVR1B	91	pink	hsa_circ_0003729
BMP2	650				INHBC	3626	pink
BGLAP	632				CBFB	865	pink
SPP1	6696				LIF	3976	pink
DLX5	1749				BMP7	655	pink	hsa_circ_0115506
CBFB	865				NOG	9241	pink
BMP7	655				CHRD	8646	pink	hsa_circ_0068354
AcvR1b	91
LIF	3976
INHBA	3624
	3625
	3626
	83729
Nodal	4838
BMP4	652
FGF2	2247
IGF1	3479
Wnt+++

## Sheet: miRNA-mRNA
miRNA	EnsemblID	GeneSymbol	Score	Position	Binding Site	Au	Me	N Pairings	Targetscan	Mirdb	Mirtarbase	miRNA reference
hsa-miR-217	ENST00000225512	WNT3	1	3UTR	27252755	0.4	-11.418	14	LINK	Link	—
hsa-miR-1224-5p	ENST00000290167	WNT4	0.97	3UTR	20802101	0.5	-4.794	16	LINK	Link	—
hsa-miR-24-3p	ENST00000343737	WNT8B	1	3UTR	15931641	0.47	-8.005	15	LINK	Link	—
hsa-miR-6807-3p	ENST00000478660	RUNX2	1	3UTR	17831803	0.56	-9.076	17	LINK	Link	—
hsa-miR-452-5p	ENST00000337514	IGF1	1	3UTR	19942019	0.52	-4.957	20	LINK	Link	—
hsa-miR-892c-3p	ENST00000337514	IGF1	1	3UTR	18431860	0.56	-6.97	15	LINK	Link	—
hsa-miR-452-5p	ENST00000456098	IGF1	1	3UTR	20432068	0.52	-4.957	20	LINK	Link	—
hsa-miR-892c-3p	ENST00000456098	IGF1	1	3UTR	18921909	0.56	-6.97	15	LINK	Link	—
hsa-miR-452-5p	ENST00000424202	IGF1	1	3UTR	18321857	0.52	-4.957	20	LINK	Link	—
hsa-miR-892c-3p	ENST00000424202	IGF1	1	3UTR	16811698	0.56	-6.97	15	LINK	Link	—
hsa-miR-135a-5p	ENST00000541224	ACVR1B	1	3UTR	27522785	0.48	-6.2	16	LINK	Link	—	microRNA-30e
hsa-miR-145-5p	ENST00000541224	ACVR1B	1	3UTR	29182962	0.44	-5.763	18	LINK	Link	—	miR-24
hsa-miR-135a-5p	ENST00000257963	ACVR1B	1	3UTR	26292662	0.48	-6.2	16	LINK	Link	—	MicroRNA 199a-5p
hsa-miR-145-5p	ENST00000257963	ACVR1B	1	3UTR	27952839	0.44	-5.763	18	LINK	Link	—	miR-98
hsa-miR-135a-5p	ENST00000542485	ACVR1B	1	3UTR	25812614	0.48	-6.2	16	LINK	Link	—	MiR-UL148D
hsa-miR-145-5p	ENST00000542485	ACVR1B	1	3UTR	27472791	0.44	-5.763	18	LINK	Link	—
hsa-miR-129-5p	ENST00000309668	INHBC	1	3UTR	27972812	0.5	-17.11	13	LINK	Link	—	none
hsa-miR-19b-3p	ENST00000290858	CBFB	1	3UTR	9841021	0.66	-4.85	14	LINK	Link	—	none
hsa-miR-5195-3p	ENST00000290858	CBFB	1	3UTR	15831602	0.56	-8.127	17	LINK	Link	—
hsa-miR-6088	ENST00000290858	CBFB	1	3UTR	28552876	0.57	-5.814	16	LINK	Link	—
hsa-miR-19b-3p	ENST00000412916	CBFB	1	3UTR	953990	0.66	-4.85	14	LINK	Link	—
hsa-miR-5195-3p	ENST00000412916	CBFB	1	3UTR	15521571	0.56	-8.127	17	LINK	Link	—
hsa-miR-6088	ENST00000412916	CBFB	1	3UTR	28242845	0.57	-5.814	16	LINK	Link	—
hsa-miR-18b-5p	ENST00000249075	LIF	1	3UTR	30373065	0.47	-6.501	20	LINK	Link	—	mir-199a
hsa-miR-758-3p	ENST00000395863	BMP7	1	3UTR	27102740	0.46	-5.337	14	LINK	Link	—	miR-137
hsa-miR-148b-3p	ENST00000332822	NOG	1	3UTR	13661403	0.59	-5.036	16	LINK	Link	—	none
hsa-let-7b-5p	ENST00000204604	CHRD	1	3UTR	32403258	0.37	-7.182	15	LINK	Link	—	none
hsa-let-7b-5p	ENST00000450923	CHRD	1	3UTR	32373255	0.37	-7.182	15	LINK	Link	—

## Sheet: Sheet2
WNT1	Wnt Family Member 1	Protein Coding	57	GC12P049007	44.49
6463		WNT10A	Wnt Family Member 10A	Protein Coding	57	GC02P218880	25.98
6464		WNT10B	Wnt Family Member 10B	Protein Coding	59	GC12M048965	37.46
6465		WNT11	Wnt Family Member 11	Protein Coding	53	GC11M076186	30.8
6466		WNT16	Wnt Family Member 16	Protein Coding	50	GC07P121325	27.44
6467		WNT2	Wnt Family Member 2	Protein Coding	53	GC07M117276	32.51
6468		WNT2B	Wnt Family Member 2B	Protein Coding	51	GC01P112466	28.48
6469		WNT3	Wnt Family Member 3	Protein Coding	57	GC17M046762	41.12
6470		WNT3A	Wnt Family Member 3A	Protein Coding	57	GC01P228007	47.22
6471		WNT4	Wnt Family Member 4	Protein Coding	56	GC01M022190	33.71
6472		WNT5A	Wnt Family Member 5A	Protein Coding	60	GC03M055474	48.31
6473		WNT5B	Wnt Family Member 5B	Protein Coding	53	GC12P001529	28.26
6474		WNT6	Wnt Family Member 6	Protein Coding	51	GC02P218859	24.87
6475		WNT7A	Wnt Family Member 7A	Protein Coding	60	GC03M014370	32.38
		WNT7B	Wnt Family Member 7B	Protein Coding	51	GC22M045920	29.26
6477		WNT8A	Wnt Family Member 8A	Protein Coding	48	GC05P138095	23.55
6478		WNT8B	Wnt Family Member 8B	Protein Coding	49	GC10P100463	24.68
6479		WNT9A	Wnt Family Member 9A	Protein Coding	49	GC01M227920	25.49
6480		WNT9B

## Sheet: Sheet3
miRNA	EnsemblID	GeneSymbol	Score	Position	Binding Site	Au	Me	N Pairings	Targetscan	Mirdb	Mirtarbase
hsa-miR-217	ENST00000225512	WNT3	1	3UTR	27252755	0.4	-11.418	14	LINK	Link	—
hsa-miR-1224-5p	ENST00000290167	WNT4	0.97	3UTR	20802101	0.5	-4.794	16	LINK	Link	—
hsa-miR-24-3p	ENST00000343737	WNT8B	1	3UTR	15931641	0.47	-8.005	15	LINK	Link	—
hsa-miR-6807-3p	ENST00000478660	RUNX2	1	3UTR	17831803	0.56	-9.076	17	LINK	Link	—
hsa-miR-452-5p	ENST00000337514	IGF1	1	3UTR	19942019	0.52	-4.957	20	LINK	Link	—
hsa-miR-892c-3p	ENST00000337514	IGF1	1	3UTR	18431860	0.56	-6.97	15	LINK	Link	—
hsa-miR-452-5p	ENST00000456098	IGF1	1	3UTR	20432068	0.52	-4.957	20	LINK	Link	—
hsa-miR-892c-3p	ENST00000456098	IGF1	1	3UTR	18921909	0.56	-6.97	15	LINK	Link	—
hsa-miR-452-5p	ENST00000424202	IGF1	1	3UTR	18321857	0.52	-4.957	20	LINK	Link	—
hsa-miR-892c-3p	ENST00000424202	IGF1	1	3UTR	16811698	0.56	-6.97	15	LINK	Link	—
hsa-miR-135a-5p	ENST00000541224	ACVR1B	1	3UTR	27522785	0.48	-6.2	16	LINK	Link	—
hsa-miR-145-5p	ENST00000541224	ACVR1B	1	3UTR	29182962	0.44	-5.763	18	LINK	Link	—
hsa-miR-135a-5p	ENST00000257963	ACVR1B	1	3UTR	26292662	0.48	-6.2	16	LINK	Link	—
hsa-miR-145-5p	ENST00000257963	ACVR1B	1	3UTR	27952839	0.44	-5.763	18	LINK	Link	—
hsa-miR-135a-5p	ENST00000542485	ACVR1B	1	3UTR	25812614	0.48	-6.2	16	LINK	Link	—
hsa-miR-145-5p	ENST00000542485	ACVR1B	1	3UTR	27472791	0.44	-5.763	18	LINK	Link	—
hsa-miR-129-5p	ENST00000309668	INHBC	1	3UTR	27972812	0.5	-17.11	13	LINK	Link	—
hsa-miR-19b-3p	ENST00000290858	CBFB	1	3UTR	9841021	0.66	-4.85	14	LINK	Link	—
hsa-miR-5195-3p	ENST00000290858	CBFB	1	3UTR	15831602	0.56	-8.127	17	LINK	Link	—
hsa-miR-6088	ENST00000290858	CBFB	1	3UTR	28552876	0.57	-5.814	16	LINK	Link	—
hsa-miR-19b-3p	ENST00000412916	CBFB	1	3UTR	953990	0.66	-4.85	14	LINK	Link	—
hsa-miR-5195-3p	ENST00000412916	CBFB	1	3UTR	15521571	0.56	-8.127	17	LINK	Link	—
hsa-miR-6088	ENST00000412916	CBFB	1	3UTR	28242845	0.57	-5.814	16	LINK	Link	—
<p><img src="http://zmf.umm.uni-heidelberg.de/analytics/piwik/piwik.php?idsite=34" style="border:0;" alt="" /></p>
hsa-miR-18b-5p	ENST00000249075	LIF	1	3UTR	30373065	0.47	-6.501	20	LINK	Link	—
hsa-miR-758-3p	ENST00000395863	BMP7	1	3UTR	27102740	0.46	-5.337	14	LINK	Link	—
«
1
2
»
<p><img src="http://zmf.umm.uni-heidelberg.de/analytics/piwik/piwik.php?idsite=34" style="border:0;" alt="" /></p>
hsa-miR-148b-3p	ENST00000332822	NOG	1	3UTR	13661403	0.59	-5.036	16	LINK	Link	—
hsa-let-7b-5p	ENST00000204604	CHRD	1	3UTR	32403258	0.37	-7.182	15	LINK	Link	—
hsa-let-7b-5p	ENST00000450923	CHRD	1	3UTR	32373255	0.37	-7.182	15	LINK	Link	—
